# Supplementary material for: “Well, I Signed Up to Be a Soldier; I Have Been Trained and Equipped Well”: Exploring Healthcare Workers’ Experiences during COVID-19 Organizational Changes in Singapore, from the First Wave to the Path towards Endemicity
Source: MDPI journal article supplement (doi:10.3390/ijerph19042477), 2022-02-21
Supplement: s1 [file s1]

Supplementary Box S1: Questions eliciting e-dairy entries

*We would love to hear your stories about how you have been coping with the psychological stress of being at the frontlines. Please share with us a snapshot of the stress you face and what you do to cope with it. This can be in the form of a journal or diary entry, an audio recording, a photo with a brief description, or artistic expression like poetry or drawing. You can upload your entry anonymously below. This section is entirely voluntary and you will remain anonymous.*

*Q1: Enter journal or diary entry here*

*Q2: Upload photo with brief description or audio recording here*

*Q3: Upload photo of poetry or drawing here*

Supplementary Table S1: Characteristics of participants responders and non-responders for e-diary data, based on grand total n=3616 who completed at least one survey item

|                         |                       | Total<br>N=3616 <sup>†</sup><br>Counts (%) | Total respondents for<br>e-dairy<br>N=663<br>Counts (%) | Total non-<br>respondents for e-<br>dairy<br>N=2953<br>Counts (%) | p-value    |
|-------------------------|-----------------------|--------------------------------------------|---------------------------------------------------------|-------------------------------------------------------------------|------------|
| Age                     | 21yrs. to 30 yrs.     | 1038 (28.7)                                | 205 (30.9)                                              | 833 (28.2)                                                        | 0.344      |
|                         | 31 yrs. to 50 yrs.    | 2079 (57.5)                                | 374 (56.4)                                              | 1705 (57.7)                                                       |            |
|                         | Above 51 yrs.         | 494 (13.7)                                 | 84 (12.7)                                               | 410 (3.9)                                                         |            |
| Gender                  | Female                | 2700 (74.7)                                | 507 (76.5)                                              | 2193 (74.3)                                                       | 0.258      |
|                         | Male                  | 916 (25.3)                                 | 156 (23.5)                                              | 760 (25.7)                                                        |            |
| Nationality             | Local                 | 1694 (46.9)                                | 282 (42.5)                                              | 1412 (47.8)                                                       | 0.016*     |
|                         | Non-local             | 1922 (53.2)                                | 381 (57.5)                                              | 1541 (52.2)                                                       |            |
| Marital Status          | Single                | 1564 (43.1)                                | 298 (44.9)                                              | 1266 (42.9)                                                       | 0.286      |
|                         | Married               | 1911 (52.9)                                | 343 (51.7)                                              | 1568 (53.1)                                                       |            |
|                         | Divorced/Widowed      | 155 (4.2)                                  | 22 (3.3)                                                | 133 (4.5)                                                         |            |
| Accommodation           | Alone                 | 214 (5.9)                                  | 53 (8.0)                                                | 161 (5.5)                                                         | 0.001**    |
|                         | Family                | 2183 (60.4)                                | 366 (55.2)                                              | 1817 (61.5)                                                       |            |
|                         | Hostel                | 128 (3.5)                                  | 18 (2.7)                                                | 110 (3.7)                                                         |            |
|                         | Rental room/apartment | 1080 (29.9)                                | 226 (34.1)                                              | 854 (28.9)                                                        |            |
| Years of Experience     | 0 to 10 yrs.          | 2029 (56.1)                                | 362 (54.6)                                              | 1667(56.5)                                                        | 0.024*     |
|                         | 11 to 20 yrs.         | 1050 (29)                                  | 185 (27.9)                                              | 865 (29.3)                                                        |            |
|                         | 21 to 30 yrs.         | 294 (8.1)                                  | 73 (11.0)                                               | 221 (7.5)                                                         |            |
|                         | More than 30 yrs.     | 210 (5.8)                                  | 43 (6.5)                                                | 167 (5.7)                                                         |            |
| Cadre                   | Doctor                | 305 (8.4)                                  | 69 (10.4)                                               | 236 (8.0)                                                         | 0.184      |
|                         | Nurse                 | 1870 (51.7)                                | 327 (49.3)                                              | 1543 (52.7)                                                       |            |
|                         | Allied health         | 677 (18.7)                                 | 128 (19.3)                                              | 549 (18.8)                                                        |            |
|                         | Administrative etc.   | 739 (20.4)                                 | 139 (21.0)                                              | 600 (20.5)                                                        |            |
| COVID-19 Daily Exposure | Yes                   | 404 (11.2)                                 | 111 (16.7)                                              | 293 (9.9)                                                         | < 0.001*** |
|                         | No                    | 3212 (88.8)                                | 552 (83.3)                                              | 2660 (90.1)                                                       |            |

<sup>†</sup>Reproduced with permission from Chan et al, 2021 [27], based on n=3616 who completed at least one survey item

Note. \*p <.05; \*\*p <.01; \*\*\*p <.001

Supplementary Table S2: Characteristics of survey participants according to institutional affiliation (blinded), n=663

|                |                       | Total<br>N=663<br>Count (%) | Hospital A<br>N=117<br>Counts(%) | Hospital B<br>N=111<br>Counts(%) | Hospital C<br>N=38<br>Counts(%) | Hospital D<br>N=126<br>Counts(%) | Hospital E<br>N=25<br>Counts(%) | Hospice A<br>N=178<br>Counts(%) | Hospice B<br>N=8<br>Counts(%) | Polyclinic A<br>N=44<br>Counts(%) | Polyclinic B<br>N=16<br>Counts(%) | <i>p</i> -value |
|----------------|-----------------------|-----------------------------|----------------------------------|----------------------------------|---------------------------------|----------------------------------|---------------------------------|---------------------------------|-------------------------------|-----------------------------------|-----------------------------------|-----------------|
| Age            | 21yrs. to 30 yrs.     | 205 (30.9)                  | 26 (22.2)                        | 11 (28.9)                        | 11 (28.9)                       | 32 (25.4)                        | 13 (52.0)                       | 3 (37.5)                        | 68 (38.2)                     | 13 (29.5)                         | 2 (12.5)                          | 0.07            |
|                | 31 yrs. to 50 yrs.    | 374 (56.4)                  | 71 (60.7)                        | 26 (68.4)                        | 26 (68.4)                       | 76 (60.3)                        | 11 (44.0)                       | 4 (50.0)                        | 90 (50.6)                     | 24 (54.5)                         | 12 (75.0)                         |                 |
|                | Above 51 yrs.         | 84 (12.7)                   | 20 (17.1)                        | 1 (2.7)                          | 1 (2.7)                         | 18 (14.3)                        | 1 (4.0)                         | 1 (12.5)                        | 20 (11.2)                     | 7 (15.9)                          | 2 (12.5)                          |                 |
| Gender         | Female                | 507 (76.5)                  | 80 (68.4)                        | 32 (84.2)                        | 32 (84.2)                       | 101 (80.2)                       | 16 (64.0)                       | 6 (75.0)                        | 139 (78.1)                    | 36 (81.8)                         | 10 (62.5)                         | 0.17            |
|                | Male                  | 156 (23.5)                  | 37 (31.6)                        | 6 (15.8)                         | 6 (15.8)                        | 25 (19.8)                        | 9 (36.0)                        | 2 (25.0)                        | 39 (21.9)                     | 8 (18.2)                          | 6 (37.5)                          |                 |
| Nationality    | Local                 | 283 (42.7)                  | 56 (47.9)                        | 19 (50.0)                        | 19 (50.0)                       | 75 (59.5)                        | 9 (36.0)                        | 3 (37.5)                        | 25 (14.0)                     | 27 (61.4)                         | 13 (81.2)                         | <0.001***       |
|                | Non-local             | 380 (57.3)                  | 61 (52.1)                        | 19 (50.0)                        | 19 (50.0)                       | 51 (40.5)                        | 16 (64.0)                       | 5 (62.5)                        | 153 (86.0)                    | 17 (38.6)                         | 3 (18.8)                          |                 |
| Marital Status | Single                | 298 (44.9)                  | 40 (34.2)                        | 14 (36.8)                        | 14 (36.8)                       | 47 (37.3)                        | 14 (56.0)                       | 7 (87.5)                        | 108 (60.7)                    | 15 (34.1)                         | 3 (18.8)                          | <0.001***       |
|                | Married               | 343 (51.7)                  | 72 (61.5)                        | 21 (55.3)                        | 21 (55.3)                       | 75 (59.5)                        | 11 (44.0)                       | 1 (12.5)                        | 64 (36.0)                     | 27 (61.4)                         | 13 (81.2)                         |                 |
|                | Divorced/Separated    | 14 (2.1)                    | 3 (2.6)                          | 3 (7.9)                          | 3 (7.9)                         | 3 (2.4)                          | 0 (0)                           | 0 (0.0)                         | 1 (0.6)                       | 2 (4.5)                           | 0 (0)                             |                 |
|                | Widowed               | 8 (1.2)                     | 2 (1.7)                          | 0 (0)                            | 0 (0)                           | 1 (0.8)                          | 0 (0)                           | 0 (0)                           | 5 (2.8)                       | 0 (0)                             | 0 (0)                             |                 |
| Accommodation  | Alone                 | 53 (8.0)                    | 14 (12.0)                        | 6 (15.8)                         | 6 (15.8)                        | 10 (7.9)                         | 0 (0)                           | 1 (12.5)                        | 11 (6.2)                      | 4 (9.1)                           | 0 (0)                             | <0.001***       |
|                | Family                | 367 (55.4)                  | 72 (61.5)                        | 23 (60.5)                        | 23 (60.5)                       | 99 (78.6)                        | 14 (56.0)                       | 3 (37.5)                        | 37 (20.8)                     | 32 (72.7)                         | 16 (100)                          |                 |
|                | Hostel                | 18 (2.7)                    | 0 (0)                            | 0 (0)                            | 0 (0)                           | 0 (0)                            | 1 (4.0)                         | 0 (0)                           | 17 (9.6)                      | 0 (0)                             | 0 (0)                             |                 |
|                | Rental room/apartment | 225 (33.9)                  | 31 (26.5)                        | 9 (23.7)                         | 9 (23.7)                        | 17 (13.5)                        | 10 (40.0)                       | 4 (50.0)                        | 113 (63.5)                    | 8 (18.2)                          | 0 (0)                             |                 |
|                | 0 to 10 yrs.          | 362 (54.6)                  | 52 (44.4)                        | 21 (55.3)                        | 21 (55.3)                       | 59 (46.8)                        | 17 (68.0)                       | 3 (37.5)                        | 120 (67.4)                    | 23 (52.3)                         | 5 (31.2)                          | 0.03*           |

|                     |                     |                |                |              |              |              |              |              |                |              |              |           |
|---------------------|---------------------|----------------|----------------|--------------|--------------|--------------|--------------|--------------|----------------|--------------|--------------|-----------|
| Years of Experience | 11 to 20 yrs.       | 185 (27.9)     | 40 (34.2)      | 13 (34.2)    | 13 (34.2)    | 44 (34.9)    | 4 (16.0)     | 2 (25.0)     | 34 (19.1)      | 12 (27.3)    | 6 (37.5)     |           |
|                     | 21 to 30 yrs.       | 73 (11.0)      | 15 (12.8)      | 4 (10.5)     | 4 (10.5)     | 12 (9.5)     | 4 (16.0)     | 2 (25.0)     | 13 (7.3)       | 7 (15.9)     | 3 (18.8)     |           |
|                     | More than 30 yrs.   | 40 (6.0)       | 9 (7.7)        | 0 (0)        | 0 (0)        | 11 (8.7)     | 0 (0)        | 1 (12.5)     | 9 (5.1)        | 2 (4.5)      | 2 (12.5)     |           |
|                     | <i>Missing</i>      | <i>3 (0.5)</i> | <i>1 (0.9)</i> | <i>0 (0)</i> | <i>2 (1.1)</i> | <i>0 (0)</i> | <i>0 (0)</i> |           |
| Cadre               | Doctor              | 69 (10.4)      | 5 (4.3)        | 11 (10.0)    | 1 (3.6)      | 32 (25.4)    | 5 (20.0)     | 0 (0)        | 1 (12.5)       | 10 (22.7)    | 4 (25.0)     | <0.001*** |
|                     | Nurse               | 327 (49.3)     | 74 (63.2)      | 55 (49.5)    | 9 (32.1)     | 35 (27.8)    | 17 (68.0)    | 109 (61.2)   | 6 (75.0)       | 9 (20.5)     | 3 (18.8)     |           |
|                     | Allied health       | 128 (19.3)     | 31 (26.5)      | 22 (19.8)    | 7 (25.0)     | 35 (27.8)    | 2 (8.0)      | 20 (11.2)    | 0 (0)          | 8 (18.2)     | 3 (18.8)     |           |
|                     | Administrative etc. | 139 (21.0)     | 7 (6.0)        | 23 (20.7)    | 11 (39.3)    | 24 (19.0)    | 1 (4.0)      | 49 (27.6)    | 1 (12.5)       | 17 (38.6)    | 6 (37.4)     |           |
| COVID-19 Exposure   | Yes                 | 229 (34.5)     | 20 (17.1)      | 20 (52.6)    | 20 (52.6)    | 61 (48.4)    | 17 (68.0)    | 3 (37.5)     | 14 (7.9)       | 24 (54.5)    | 6 (37.5)     | <0.001*** |
|                     | No                  | 434 (65.5)     | 97 (82.9)      | 18 (47.4)    | 18 (47.4)    | 65 (51.6)    | 8 (32.0)     | 5 (62.5)     | 164 (92.1)     | 20 (45.5)    | 10 (62.5)    |           |

Note. \* $p < .05$ ; \*\*\* $p < .001$
